# Supplementary material for: Intrinsic protein disorder in human pathways
Source: Royal Society of Chemistry journal article supplement (doi:10.1039/c1mb05274h), 2011-10-20
Supplement: c1mb05274h.pdf [file c1mb05274h.pdf]

Table SM-1. Fraction disorder in metabolic pathways, averaged over unique “gene” entries (containing one or more proteins each) and unique proteins over all the gene entries.

| Pathway  | Number of "gene" entries | Average fraction disorder of nodes | Number of proteins | Average fraction disorder of proteins | Pathway name                                        |
|----------|--------------------------|------------------------------------|--------------------|---------------------------------------|-----------------------------------------------------|
| hsa00010 | 27                       | 0.0666                             | 65                 | 0.059                                 | Glycolysis / Gluconeogenesis                        |
| hsa00020 | 16                       | 0.1187                             | 30                 | 0.122                                 | Citrate cycle (TCA cycle)                           |
| hsa00030 | 17                       | 0.0709                             | 28                 | 0.069                                 | Pentose phosphate pathway                           |
| hsa00040 | 11                       | 0.0470                             | 33                 | 0.041                                 | Pentose and glucuronate interconversions            |
| hsa00051 | 18                       | 0.0650                             | 36                 | 0.091                                 | Fructose and mannose metabolism                     |
| hsa00052 | 15                       | 0.0663                             | 27                 | 0.067                                 | Galactose metabolism                                |
| hsa00053 | 5                        | 0.0504                             | 27                 | 0.041                                 | Ascorbate and aldarate metabolism                   |
| hsa00061 | 5                        | 0.1333                             | 6                  | 0.139                                 | Fatty acid biosynthesis                             |
| hsa00062 | 6                        | 0.0632                             | 8                  | 0.055                                 | Fatty acid elongation in mitochondria               |
| hsa00071 | 18                       | 0.094                              | 44                 | 0.078                                 | Fatty acid metabolism                               |
| hsa00072 | 5                        | 0.086                              | 9                  | 0.081                                 | Synthesis and degradation of ketone bodies          |
| hsa00100 | 16                       | 0.099                              | 19                 | 0.108                                 | Steroid biosynthesis                                |
| hsa00120 | 16                       | 0.080                              | 16                 | 0.080                                 | Primary bile acid biosynthesis                      |
| hsa00130 | 7                        | 0.152                              | 7                  | 0.152                                 | Ubiquinone and other terpenoid-quinone biosynthesis |
| hsa00140 | 25                       | 0.079                              | 57                 | 0.062                                 | Steroid hormone biosynthesis                        |
| hsa00190 | 112                      | 0.201                              | 132                | 0.211                                 | Oxidative phosphorylation                           |
| hsa00230 | 49                       | 0.100                              | 163                | 0.172                                 | Purine metabolism                                   |
| hsa00232 | 4                        | 0.043                              | 7                  | 0.036                                 | Caffeine metabolism                                 |
| hsa00240 | 32                       | 0.125                              | 100                | 0.173                                 | Pyrimidine metabolism                               |
| hsa00250 | 23                       | 0.060                              | 32                 | 0.066                                 | Alanine, aspartate and glutamate metabolism         |
| hsa00260 | 28                       | 0.071                              | 32                 | 0.077                                 | Glycine, serine and threonine metabolism            |
| hsa00270 | 22                       | 0.096                              | 36                 | 0.111                                 | Cysteine and methionine metabolism                  |
| hsa00280 | 30                       | 0.102                              | 44                 | 0.097                                 | Valine, leucine and isoleucine degradation          |
| hsa00290 | 5                        | 0.086                              | 11                 | 0.087                                 | Valine, leucine and isoleucine biosynthesis         |
| hsa00300 | 3                        | 0.048                              | 3                  | 0.048                                 | Lysine biosynthesis                                 |
| hsa00310 | 17                       | 0.128                              | 49                 | 0.319                                 | Lysine degradation                                  |
| hsa00330 | 35                       | 0.086                              | 55                 | 0.090                                 | Arginine and proline metabolism                     |
| hsa00340 | 15                       | 0.080                              | 30                 | 0.080                                 | Histidine metabolism                                |
| hsa00350 | 23                       | 0.068                              | 41                 | 0.065                                 | Tyrosine metabolism                                 |
| hsa00360 | 11                       | 0.062                              | 17                 | 0.055                                 | Phenylalanine metabolism                            |
| hsa00380 | 26                       | 0.084                              | 42                 | 0.084                                 | Tryptophan metabolism                               |
| hsa00400 | 4                        | 0.095                              | 5                  | 0.085                                 | Phenylalanine, tyrosine and                         |

|          |    |       |    |       |                                                            |
|----------|----|-------|----|-------|------------------------------------------------------------|
|          |    |       |    |       | tryptophan biosynthesis                                    |
| hsa00410 | 16 | 0.099 | 27 | 0.085 | beta-Alanine metabolism                                    |
| hsa00430 | 6  | 0.129 | 10 | 0.122 | Taurine and hypotaurine metabolism                         |
| hsa00450 | 11 | 0.099 | 17 | 0.095 | Selenocompound metabolism                                  |
| hsa00460 | 3  | 0.069 | 7  | 0.085 | Cyanoamino acid metabolism                                 |
| hsa00471 | 2  | 0.130 | 4  | 0.129 | D-Glutamine and D-glutamate metabolism                     |
| hsa00472 | 1  | 0.046 | 1  | 0.046 | D-Arginine and D-ornithine metabolism                      |
| hsa00480 | 19 | 0.091 | 50 | 0.075 | Glutathione metabolism                                     |
| hsa00500 | 22 | 0.061 | 55 | 0.050 | Starch and sucrose metabolism                              |
| hsa00510 | 35 | 0.114 | 49 | 0.137 | N-Glycan biosynthesis                                      |
| hsa00511 | 11 | 0.063 | 17 | 0.066 | Other glycan degradation                                   |
| hsa00512 | 9  | 0.150 | 30 | 0.160 | Mucin type O-Glycan biosynthesis                           |
| hsa00514 | 17 | 0.129 | 46 | 0.099 | Other types of O-glycan biosynthesis                       |
| hsa00520 | 33 | 0.061 | 48 | 0.054 | Amino sugar and nucleotide sugar metabolism                |
| hsa00524 | 2  | 0.056 | 5  | 0.058 | Butirosin and neomycin biosynthesis                        |
| hsa00531 | 15 | 0.055 | 19 | 0.060 | Glycosaminoglycan degradation                              |
| hsa00532 | 15 | 0.205 | 22 | 0.214 | Glycosaminoglycan biosynthesis - chondroitin sulfate       |
| hsa00533 | 10 | 0.173 | 15 | 0.175 | Glycosaminoglycan biosynthesis - keratan sulfate           |
| hsa00534 | 16 | 0.198 | 26 | 0.197 | Glycosaminoglycan biosynthesis - heparan sulfate           |
| hsa00561 | 16 | 0.088 | 50 | 0.115 | Glycerolipid metabolism                                    |
| hsa00562 | 24 | 0.248 | 57 | 0.270 | Inositol phosphate metabolism                              |
| hsa00563 | 25 | 0.105 | 25 | 0.105 | Glycosylphosphatidylinositol(GPI)-anchor biosynthesis      |
| hsa00564 | 36 | 0.141 | 82 | 0.144 | Glycerophospholipid metabolism                             |
| hsa00565 | 12 | 0.118 | 36 | 0.111 | Ether lipid metabolism                                     |
| hsa00590 | 28 | 0.054 | 59 | 0.078 | Arachidonic acid metabolism                                |
| hsa00591 | 4  | 0.050 | 30 | 0.085 | Linoleic acid metabolism                                   |
| hsa00592 | 3  | 0.097 | 20 | 0.111 | alpha-Linolenic acid metabolism                            |
| hsa00600 | 23 | 0.099 | 40 | 0.110 | Sphingolipid metabolism                                    |
| hsa00601 | 30 | 0.141 | 26 | 0.130 | Glycosphingolipid biosynthesis - lacto and neolacto series |
| hsa00603 | 11 | 0.066 | 14 | 0.067 | Glycosphingolipid biosynthesis - globo series              |
| hsa00604 | 15 | 0.110 | 15 | 0.103 | Glycosphingolipid biosynthesis - ganglio series            |
| hsa00620 | 21 | 0.081 | 40 | 0.077 | Pyruvate metabolism                                        |
| hsa00630 | 13 | 0.066 | 18 | 0.065 | Glyoxylate and dicarboxylate metabolism                    |
| hsa00640 | 16 | 0.105 | 32 | 0.090 | Propanoate metabolism                                      |
| hsa00650 | 16 | 0.080 | 30 | 0.075 | Butanoate metabolism                                       |
| hsa00670 | 16 | 0.071 | 18 | 0.074 | One carbon pool by folate                                  |

|          |     |       |      |       |                                              |
|----------|-----|-------|------|-------|----------------------------------------------|
| hsa00730 | 4   | 0.100 | 4    | 0.100 | Thiamine metabolism                          |
| hsa00740 | 6   | 0.060 | 12   | 0.068 | Riboflavin metabolism                        |
| hsa00750 | 5   | 0.057 | 6    | 0.051 | Vitamin B6 metabolism                        |
| hsa00760 | 15  | 0.089 | 25   | 0.108 | Nicotinate and nicotinamide metabolism       |
| hsa00770 | 11  | 0.118 | 17   | 0.116 | Pantothenate and CoA biosynthesis            |
| hsa00780 | 2   | 0.162 | 2    | 0.162 | Biotin metabolism                            |
| hsa00785 | 3   | 0.113 | 3    | 0.113 | Lipoic acid metabolism                       |
| hsa00790 | 10  | 0.114 | 13   | 0.104 | Folate biosynthesis                          |
| hsa00830 | 22  | 0.061 | 64   | 0.049 | Retinol metabolism                           |
| hsa00860 | 18  | 0.147 | 43   | 0.102 | Porphyrin and chlorophyll metabolism         |
| hsa00900 | 11  | 0.106 | 15   | 0.109 | Terpenoid backbone biosynthesis              |
| hsa00910 | 9   | 0.079 | 23   | 0.074 | Nitrogen metabolism                          |
| hsa00920 | 7   | 0.133 | 13   | 0.131 | Sulfur metabolism                            |
| hsa00970 | 23  | 0.131 | 41   | 0.120 | Aminoacyl-tRNA biosynthesis                  |
| hsa00980 | 13  | 0.040 | 71   | 0.038 | Metabolism of xenobiotics by cytochrome P450 |
| hsa00982 | 14  | 0.043 | 73   | 0.037 | Drug metabolism - cytochrome P450            |
| hsa00983 | 23  | 0.083 | 52   | 0.068 | Drug metabolism - other enzymes              |
| hsa01040 | 15  | 0.122 | 21   | 0.121 | Biosynthesis of unsaturated fatty acids      |
| hsa01100 | 581 | 0.096 | 1136 | 0.123 | Metabolic pathways                           |

Table SM-2. Fraction disorder in non-metabolic pathways, averaged over unique “gene” entries (containing one or more proteins each) and unique proteins over all the gene entries.

| Pathway  | Number of "gene" entries | Average fraction disorder of nodes | Number of proteins | Average fraction disorder of proteins | Pathway name                                |
|----------|--------------------------|------------------------------------|--------------------|---------------------------------------|---------------------------------------------|
| hsa02010 | 44                       | 0.133                              | 44                 | 0.133                                 | ABC transporters                            |
| hsa03008 | 56                       | 0.292                              | 82                 | 0.325                                 | Ribosome biogenesis in eukaryotes           |
| hsa03010 | 79                       | 0.259                              | 90                 | 0.267                                 | Ribosome                                    |
| hsa03013 | 95                       | 0.396                              | 153                | 0.367                                 | RNA transport                               |
| hsa03015 | 47                       | 0.437                              | 84                 | 0.379                                 | mRNA surveillance pathway                   |
| hsa03018 | 54                       | 0.313                              | 71                 | 0.314                                 | RNA degradation                             |
| hsa03020 | 27                       | 0.224                              | 30                 | 0.221                                 | RNA polymerase                              |
| hsa03022 | 33                       | 0.429                              | 54                 | 0.448                                 | Basal transcription factors                 |
| hsa03030 | 33                       | 0.264                              | 36                 | 0.257                                 | DNA replication                             |
| hsa03040 | 71                       | 0.426                              | 128                | 0.426                                 | Spliceosome                                 |
| hsa03050 | 43                       | 0.168                              | 45                 | 0.168                                 | Proteasome                                  |
| hsa03060 | 21                       | 0.274                              | 23                 | 0.257                                 | Protein export                              |
| hsa03320 | 49                       | 0.209                              | 71                 | 0.179                                 | PPAR signaling pathway                      |
| hsa03410 | 25                       | 0.280                              | 34                 | 0.305                                 | Base excision repair                        |
| hsa03420 | 29                       | 0.283                              | 48                 | 0.271                                 | Nucleotide excision repair                  |
| hsa03430 | 13                       | 0.298                              | 23                 | 0.281                                 | Mismatch repair                             |
| hsa03440 | 20                       | 0.360                              | 28                 | 0.348                                 | Homologous recombination                    |
| hsa03450 | 13                       | 0.323                              | 14                 | 0.312                                 | Non-homologous end-joining                  |
| hsa04010 | 119                      | 0.389                              | 268                | 0.322                                 | MAPK signaling pathway                      |
| hsa04012 | 47                       | 0.398                              | 87                 | 0.356                                 | ErbB signaling pathway                      |
| hsa04020 | 40                       | 0.236                              | 177                | 0.232                                 | Calcium signaling pathway                   |
| hsa04060 | 246                      | 0.262                              | 265                | 0.253                                 | Cytokine-cytokine receptor interaction      |
| hsa04062 | 49                       | 0.300                              | 189                | 0.237                                 | Chemokine signaling pathway                 |
| hsa04070 | 24                       | 0.292                              | 78                 | 0.262                                 | Phosphatidylinositol signaling system       |
| hsa04080 | 91                       | 0.214                              | 272                | 0.207                                 | Neuroactive ligand-receptor interaction     |
| hsa04110 | 79                       | 0.352                              | 128                | 0.338                                 | Cell cycle                                  |
| hsa04114 | 48                       | 0.338                              | 114                | 0.252                                 | Oocyte meiosis                              |
| hsa04115 | 55                       | 0.271                              | 69                 | 0.261                                 | p53 signaling pathway                       |
| hsa04120 | 101                      | 0.247                              | 139                | 0.239                                 | Ubiquitin mediated proteolysis              |
| hsa04122 | 9                        | 0.167                              | 10                 | 0.155                                 | Sulfur relay system                         |
| hsa04130 | 24                       | 0.464                              | 36                 | 0.465                                 | SNARE interactions in vesicular transport   |
| hsa04140 | 14                       | 0.254                              | 34                 | 0.208                                 | Regulation of autophagy                     |
| hsa04141 | 86                       | 0.331                              | 167                | 0.306                                 | Protein processing in endoplasmic reticulum |
| hsa04142 | 62                       | 0.111                              | 121                | 0.134                                 | Lysosome                                    |

|          |    |       |     |       |                                              |
|----------|----|-------|-----|-------|----------------------------------------------|
| hsa04144 | 78 | 0.383 | 203 | 0.371 | Endocytosis                                  |
| hsa04145 | 60 | 0.241 | 156 | 0.194 | Phagosome                                    |
| hsa04146 | 63 | 0.148 | 78  | 0.138 | Peroxisome                                   |
| hsa04150 | 27 | 0.335 | 52  | 0.299 | mTOR signaling pathway                       |
| hsa04210 | 49 | 0.252 | 88  | 0.240 | Apoptosis                                    |
| hsa04260 | 14 | 0.361 | 77  | 0.305 | Cardiac muscle contraction                   |
| hsa04270 | 38 | 0.275 | 116 | 0.230 | Vascular smooth muscle contraction           |
| hsa04310 | 62 | 0.385 | 151 | 0.333 | Wnt signaling pathway                        |
| hsa04320 | 13 | 0.327 | 25  | 0.280 | Dorso-ventral axis formation                 |
| hsa04330 | 22 | 0.416 | 47  | 0.414 | Notch signaling pathway                      |
| hsa04340 | 18 | 0.279 | 56  | 0.271 | Hedgehog signaling pathway                   |
| hsa04350 | 43 | 0.335 | 85  | 0.345 | TGF-beta signaling pathway                   |
| hsa04360 | 61 | 0.241 | 130 | 0.258 | Axon guidance                                |
| hsa04370 | 28 | 0.295 | 76  | 0.240 | VEGF signaling pathway                       |
| hsa04380 | 68 | 0.353 | 128 | 0.332 | Osteoclast differentiation                   |
| hsa04510 | 60 | 0.322 | 200 | 0.303 | Focal adhesion                               |
| hsa04512 | 45 | 0.215 | 85  | 0.334 | ECM-receptor interaction                     |
| hsa04514 | 87 | 0.244 | 136 | 0.240 | Cell adhesion molecules (CAMs)               |
| hsa04520 | 51 | 0.353 | 73  | 0.362 | Adherens junction                            |
| hsa04530 | 51 | 0.404 | 133 | 0.340 | Tight junction                               |
| hsa04540 | 35 | 0.254 | 90  | 0.194 | Gap junction                                 |
| hsa04610 | 58 | 0.139 | 69  | 0.157 | Complement and coagulation cascades          |
| hsa04612 | 27 | 0.288 | 78  | 0.269 | Antigen processing and presentation          |
| hsa04614 | 17 | 0.083 | 17  | 0.083 | Renin-angiotensin system                     |
| hsa04620 | 68 | 0.247 | 102 | 0.222 | Toll-like receptor signaling pathway         |
| hsa04621 | 45 | 0.281 | 59  | 0.261 | NOD-like receptor signaling pathway          |
| hsa04622 | 50 | 0.293 | 71  | 0.246 | RIG-I-like receptor signaling pathway        |
| hsa04623 | 28 | 0.285 | 62  | 0.242 | Cytosolic DNA-sensing pathway                |
| hsa04630 | 26 | 0.343 | 155 | 0.278 | Jak-STAT signaling pathway                   |
| hsa04640 | 67 | 0.242 | 88  | 0.226 | Hematopoietic cell lineage                   |
| hsa04650 | 70 | 0.267 | 136 | 0.261 | Natural killer cell mediated cytotoxicity    |
| hsa04660 | 63 | 0.315 | 108 | 0.313 | T cell receptor signaling pathway            |
| hsa04662 | 43 | 0.320 | 75  | 0.306 | B cell receptor signaling pathway            |
| hsa04664 | 35 | 0.262 | 79  | 0.205 | Fc epsilon RI signaling pathway              |
| hsa04666 | 45 | 0.316 | 95  | 0.285 | Fc gamma R-mediated phagocytosis             |
| hsa04670 | 56 | 0.276 | 117 | 0.247 | Leukocyte transendothelial migration         |
| hsa04672 | 32 | 0.293 | 49  | 0.266 | Intestinal immune network for IgA production |
| hsa04710 | 11 | 0.416 | 23  | 0.407 | Circadian rhythm - mammal                    |
| hsa04720 | 25 | 0.305 | 70  | 0.253 | Long-term potentiation                       |
| hsa04722 | 73 | 0.345 | 127 | 0.296 | Neurotrophin signaling pathway               |

|          |    |       |     |       |                                                            |
|----------|----|-------|-----|-------|------------------------------------------------------------|
| hsa04724 | 41 | 0.229 | 126 | 0.218 | Glutamatergic synapse                                      |
| hsa04730 | 25 | 0.247 | 70  | 0.194 | Long-term depression                                       |
| hsa04740 | 15 | 0.213 | 388 | 0.066 | Olfactory transduction                                     |
| hsa04742 | 18 | 0.183 | 52  | 0.139 | Taste transduction                                         |
| hsa04744 | 12 | 0.237 | 29  | 0.210 | Phototransduction                                          |
| hsa04810 | 65 | 0.365 | 214 | 0.306 | Regulation of actin cytoskeleton                           |
| hsa04910 | 62 | 0.327 | 138 | 0.285 | Insulin signaling pathway                                  |
| hsa04912 | 40 | 0.264 | 101 | 0.214 | GnRH signaling pathway                                     |
| hsa04914 | 31 | 0.306 | 87  | 0.251 | Progesterone-mediated oocyte maturation                    |
| hsa04916 | 33 | 0.321 | 101 | 0.295 | Melanogenesis                                              |
| hsa04920 | 36 | 0.298 | 69  | 0.285 | Adipocytokine signaling pathway                            |
| hsa04930 | 23 | 0.335 | 48  | 0.283 | Type II diabetes mellitus                                  |
| hsa04940 | 20 | 0.255 | 45  | 0.222 | Type I diabetes mellitus                                   |
| hsa04950 | 25 | 0.613 | 25  | 0.613 | Maturity onset diabetes of the young                       |
| hsa04960 | 19 | 0.314 | 42  | 0.266 | Aldosterone-regulated sodium reabsorption                  |
| hsa04961 | 21 | 0.211 | 49  | 0.223 | Endocrine and other factor-regulated calcium reabsorption  |
| hsa04962 | 17 | 0.286 | 44  | 0.356 | Vasopressin-regulated water reabsorption                   |
| hsa04964 | 12 | 0.136 | 23  | 0.129 | Proximal tubule bicarbonate reclamation                    |
| hsa04966 | 6  | 0.121 | 27  | 0.170 | Collecting duct acid secretion                             |
| hsa04970 | 39 | 0.294 | 89  | 0.239 | Salivary secretion                                         |
| hsa04971 | 28 | 0.273 | 74  | 0.229 | Gastric acid secretion                                     |
| hsa04972 | 43 | 0.161 | 101 | 0.148 | Pancreatic secretion                                       |
| hsa04973 | 19 | 0.123 | 44  | 0.121 | Carbohydrate digestion and absorption                      |
| hsa04974 | 26 | 0.188 | 81  | 0.336 | Protein digestion and absorption                           |
| hsa04975 | 21 | 0.167 | 46  | 0.132 | Fat digestion and absorption                               |
| hsa04976 | 49 | 0.173 | 71  | 0.163 | Bile secretion                                             |
| hsa04977 | 23 | 0.177 | 24  | 0.177 | Vitamin digestion and absorption                           |
| hsa04978 | 30 | 0.171 | 51  | 0.154 | Mineral absorption                                         |
| hsa05010 | 53 | 0.242 | 167 | 0.236 | Alzheimer's disease                                        |
| hsa05012 | 27 | 0.175 | 130 | 0.203 | Parkinson's disease                                        |
| hsa05014 | 35 | 0.281 | 53  | 0.257 | Amyotrophic lateral sclerosis (ALS)                        |
| hsa05016 | 48 | 0.362 | 183 | 0.295 | Huntington's disease                                       |
| hsa05020 | 20 | 0.259 | 35  | 0.255 | Prion diseases                                             |
| hsa05100 | 36 | 0.339 | 71  | 0.323 | Bacterial invasion of epithelial cells                     |
| hsa05110 | 18 | 0.251 | 54  | 0.202 | Vibrio cholerae infection                                  |
| hsa05120 | 33 | 0.281 | 68  | 0.228 | Epithelial cell signaling in Helicobacter pylori infection |
| hsa05130 | 27 | 0.257 | 58  | 0.198 | Pathogenic Escherichia coli infection                      |
| hsa05131 | 36 | 0.286 | 62  | 0.250 | Shigellosis                                                |
| hsa05140 | 40 | 0.304 | 73  | 0.262 | Leishmaniasis                                              |
| hsa05142 | 55 | 0.221 | 104 | 0.228 | Chagas disease (American                                   |

|          |     |       |     |       |                                                        |
|----------|-----|-------|-----|-------|--------------------------------------------------------|
|          |     |       |     |       | trypanosomiasis)                                       |
| hsa05143 | 25  | 0.238 | 35  | 0.240 | African trypanosomiasis                                |
| hsa05144 | 35  | 0.217 | 51  | 0.232 | Malaria                                                |
| hsa05145 | 53  | 0.222 | 133 | 0.206 | Toxoplasmosis                                          |
| hsa05146 | 40  | 0.230 | 106 | 0.290 | Amoebiasis                                             |
| hsa05150 | 31  | 0.184 | 56  | 0.208 | Staphylococcus aureus infection                        |
| hsa05152 | 98  | 0.269 | 182 | 0.240 | Tuberculosis                                           |
| hsa05160 | 63  | 0.269 | 135 | 0.228 | Hepatitis C                                            |
| hsa05162 | 75  | 0.281 | 134 | 0.245 | Measles                                                |
| hsa05200 | 169 | 0.337 | 327 | 0.337 | Pathways in cancer                                     |
| hsa05210 | 37  | 0.349 | 62  | 0.342 | Colorectal cancer                                      |
| hsa05211 | 36  | 0.320 | 70  | 0.325 | Renal cell carcinoma                                   |
| hsa05212 | 40  | 0.292 | 70  | 0.287 | Pancreatic cancer                                      |
| hsa05213 | 30  | 0.355 | 52  | 0.360 | Endometrial cancer                                     |
| hsa05214 | 31  | 0.279 | 65  | 0.271 | Glioma                                                 |
| hsa05215 | 40  | 0.357 | 89  | 0.381 | Prostate cancer                                        |
| hsa05216 | 15  | 0.409 | 29  | 0.465 | Thyroid cancer                                         |
| hsa05217 | 18  | 0.396 | 55  | 0.356 | Basal cell carcinoma                                   |
| hsa05218 | 23  | 0.315 | 71  | 0.307 | Melanoma                                               |
| hsa05219 | 27  | 0.258 | 42  | 0.270 | Bladder cancer                                         |
| hsa05220 | 39  | 0.367 | 73  | 0.349 | Chronic myeloid leukemia                               |
| hsa05221 | 33  | 0.362 | 58  | 0.355 | Acute myeloid leukemia                                 |
| hsa05222 | 36  | 0.271 | 85  | 0.305 | Small cell lung cancer                                 |
| hsa05223 | 32  | 0.294 | 54  | 0.291 | Non-small cell lung cancer                             |
| hsa05310 | 15  | 0.215 | 31  | 0.220 | Asthma                                                 |
| hsa05320 | 22  | 0.198 | 54  | 0.166 | Autoimmune thyroid disease                             |
| hsa05322 | 34  | 0.256 | 138 | 0.303 | Systemic lupus erythematosus                           |
| hsa05323 | 43  | 0.260 | 92  | 0.233 | Rheumatoid arthritis                                   |
| hsa05330 | 18  | 0.223 | 39  | 0.201 | Allograft rejection                                    |
| hsa05332 | 14  | 0.250 | 43  | 0.228 | Graft-versus-host disease                              |
| hsa05340 | 35  | 0.316 | 35  | 0.316 | Primary immunodeficiency                               |
| hsa05410 | 36  | 0.352 | 83  | 0.313 | Hypertrophic cardiomyopathy (HCM)                      |
| hsa05412 | 28  | 0.331 | 74  | 0.289 | Arrhythmogenic right ventricular cardiomyopathy (ARVC) |
| hsa05414 | 36  | 0.343 | 90  | 0.287 | Dilated cardiomyopathy                                 |
| hsa05416 | 31  | 0.256 | 72  | 0.295 | Viral myocarditis                                      |
